# Supplementary material for: Formation of Nitric Oxide by Aldehyde Dehydrogenase-2 Is Necessary and Sufficient for Vascular Bioactivation of Nitroglycerin
Source: PubMed Central journal article supplement (PMC5104933; doi:10.1074/jbc.m116.752071), 2016-09-27
Supplement: 10.1074_M116.752071_jbc.M116.752071-1.pdf [file 10.1074_M116.752071_jbc.M116.752071-1.pdf]

## SUPPLEMENTAL DATA

Formation of nitric oxide by aldehyde dehydrogenase-2 is necessary and sufficient for vascular bioactivation of nitroglycerin

**Marissa Opelt<sup>1</sup>, Emrah Eroglu<sup>2</sup>, Markus Waldeck-Weiermair<sup>2</sup>, Michael Russwurm<sup>3</sup>, Doris Koesling<sup>3</sup>, Roland Malli<sup>2</sup>, Wolfgang F. Graier<sup>2</sup>, John T. Fassett<sup>1</sup>, Astrid Schrammel<sup>1</sup>, and Bernd Mayer<sup>1</sup>**

<sup>1</sup>Institute of Pharmaceutical Sciences, Department of Pharmacology and Toxicology, University of Graz, Austria; <sup>2</sup>Institute of Molecular Biology and Biochemistry, Center of Molecular Medicine, Medical University of Graz, Austria; <sup>3</sup>Department of Pharmacology and Toxicology, Ruhr University Bochum, Germany

To whom correspondence should be addressed: Dr. Bernd Mayer, Department of Pharmacology and Toxicology, University of Graz, Humboldtstrasse 46/I, A-8010 Graz, Austria, Telephone: +43-316-380-5567, FAX: +43-316-380-9890, E-mail: mayer@uni-graz.at

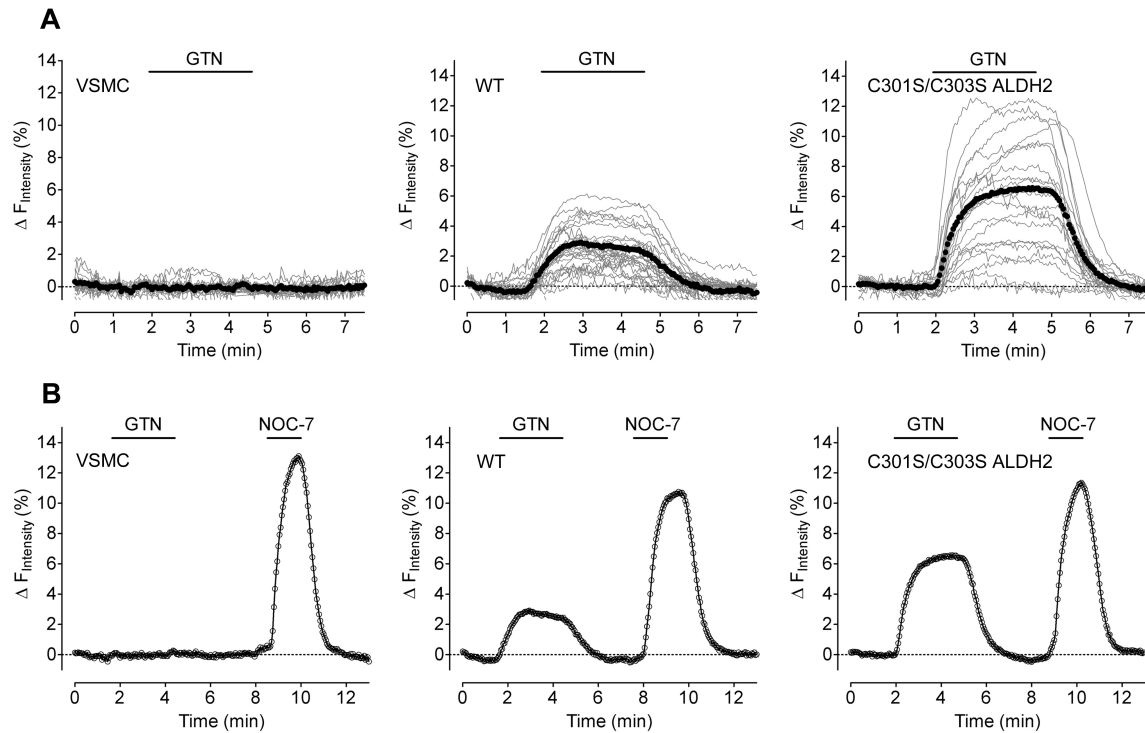

**Supplementary Figure 1. Live-cell imaging of NO release induced by GTN or NOC-7 in vascular smooth muscle cells.** **A**, Individual traces of NO release over time were measured in VSMC infected with C-geNOp alone (left panel) or in combination with either WT (middle panel) or C301S/C303S ALDH2 (right panel) in response to 1  $\mu\text{M}$  GTN in the presence of 1 mM DTT by live-cell imaging as described in *Experimental Procedures*. Average curves with SEM are shown in Figure 2B (main text). **B**, Cellular NO release of VSMC expressing either C-geNOp alone (left panel) or in combination with either WT (middle panel) or C301S/C303S ALDH2 (right panel) in response to 1  $\mu\text{M}$  GTN or 10  $\mu\text{M}$  NOC-7 in the presence of 1 mM DTT (n=27 for VSMC; n=26 for VSMC+WT; n=20 for VSMC+C301S/C303S ALDH2). Data are expressed as inverted curves (1-F/F<sub>0</sub> in %) of the number of experiments indicated in the panel description above.

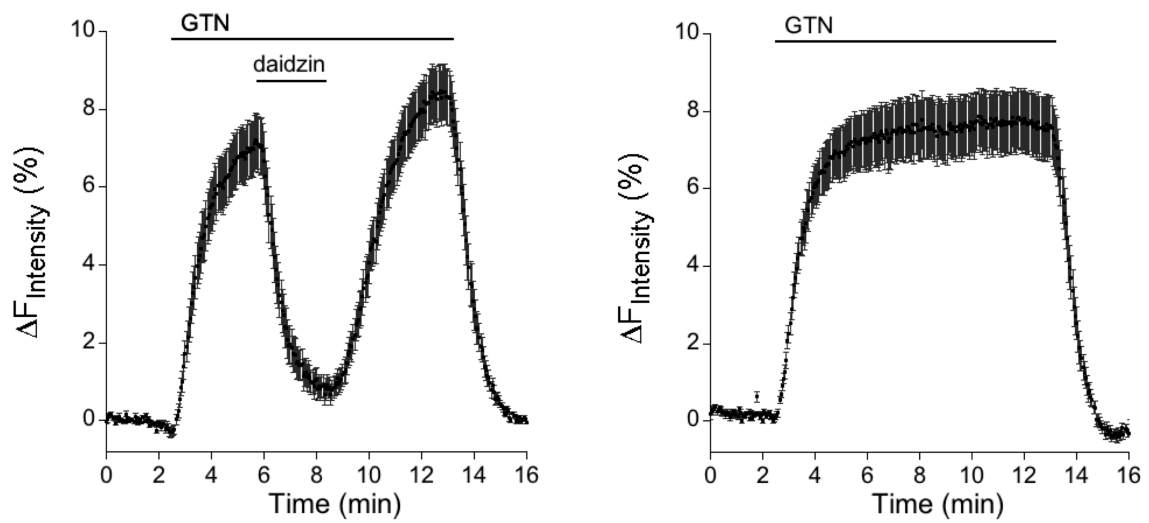

**Supplementary Figure 2. Effect of daidzin on GTN-derived NO formation in vascular smooth muscle cells expressing C301S/C303S ALDH2.** Average curves showing NO release over time in response to 1  $\mu\text{M}$  GTN in VSMC expressing C301S/C303S ALDH2 under control conditions (right panel; n=16) or upon application and subsequent washout of 0.2 mM daidzin (left panel; n=19). Data are expressed as inverted curves (1-F/F0 in %).

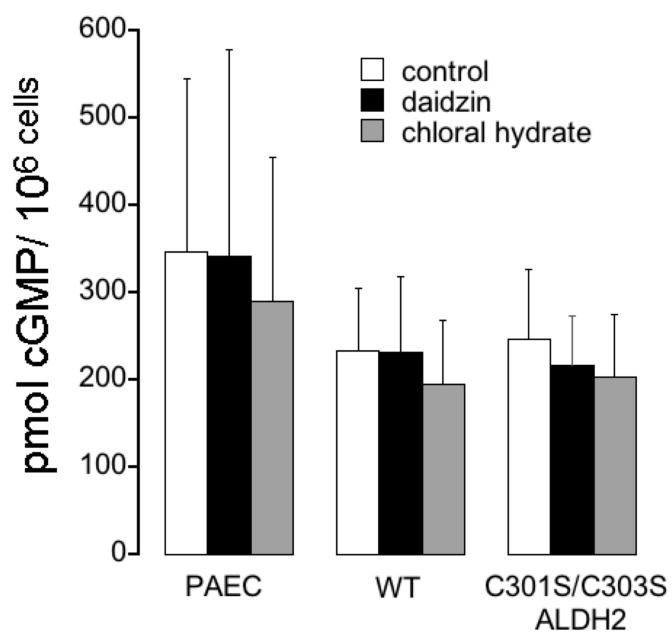

**Supplementary Figure 3. GTN-induced cGMP accumulation in cultured porcine aortic endothelial cells.** Non-infected and infected (WT or C301S/C303S ALDH2) porcine aortic endothelial cells were incubated with 1  $\mu$ M DEA/NO in the absence and presence of 0.4 mM daidzin and 5 mM chloral hydrate and cGMP formation was determined as described in *Experimental Procedures*. Data represent mean values  $\pm$  SEM of three to five independent experiments.
